# Supplementary material for: A Thermotolerant Variant of Rubisco Activase From a Wild Relative Improves Growth and Seed Yield in Rice Under Heat Stress
Source: Front Plant Sci. 2018 Nov 20;9:1663. doi: 10.3389/fpls.2018.01663 (PMC6256286; doi:10.3389/fpls.2018.01663)
Supplement: TABLE S5 — Growth and developmental characteristics among wild type and Rca transgenic rice grown at 28°C. [file Table_5.DOCX]

| **Supplementary table S5.** Growth and developmental characteristics among wild type and Rca transgenic rice grown at 28°C | | | | |
| --- | --- | --- | --- | --- |
|  | Line | | | |
| parameter | WT  *n*=30 | *T*-*Oa*- 9  *n*=35 | *T*-*Oa*-15  *n*=40 | *T*-*Oa* -19  *n*=29 |
| Tillers (total number) | 16±4a | 16±4a | 13±4b | 16±4a,b |
| Plant height (cm) | 94±6a,b | 94±6a,b | 92±6b | 97±7a |
| Fresh mass (g) | 264±66a | 268±79a | 212±77b | 316±89a |
| Dry mass (g) | NA | NA | NA | NA |
| Panicle number | 12±4a | 11±3a,b | 9±3b | 11±3a,b |
| Seed set (% filled) | 46±16 a | 73±14b | 38±20 a,b | 40±15 a,b |
| Seed number | 455±254a | 288±171b | 290±200b | 377±202a,b |
